# Supplementary material
Source: PubMed Central journal article supplement (PMC5720920)
Supplement: NIHMS910951-supplement-Supplementary_Material.pdf [file NIHMS910951-supplement-Supplementary_Material.pdf]

## [Supplementary Information]

### **Target of rapamycin complex 1 and Tap42-Associated Phosphatases Are Required for Sensing Changes in Nitrogen Conditions in the Yeast *Saccharomyces cerevisiae***

#### ***Contents:***

#### **1. Supplemental Figures**

- Supplemental Figure 1. Gln3 distribution in wild type and mutant *tor* and *tap42* cells under different nitrogen conditions
- Supplemental Figure 2. Tap42 is dispensable for nitrogen downshift-induced *GLN1* expression
- Supplemental Figure 3. TORC1 is required for nitrogen limitation or downshift-induced *GLN1* expression.
- Supplemental Figure 4. Both Tap42 and TORC1 are required for rapamycin-induced *GLN1* expression.
- Supplemental Figure 5. Expression levels of Tap42 and Kog1-HA in cells shown in Figure 4 of the main text.
- Supplemental Figure 6. Expression levels of Tap42 and Kog1-HA in cells shown in Figure 6 of the main text.

#### **2. Supplemental Methods**

#### **3. Supplemental References**

## 1. Supplemental Figures

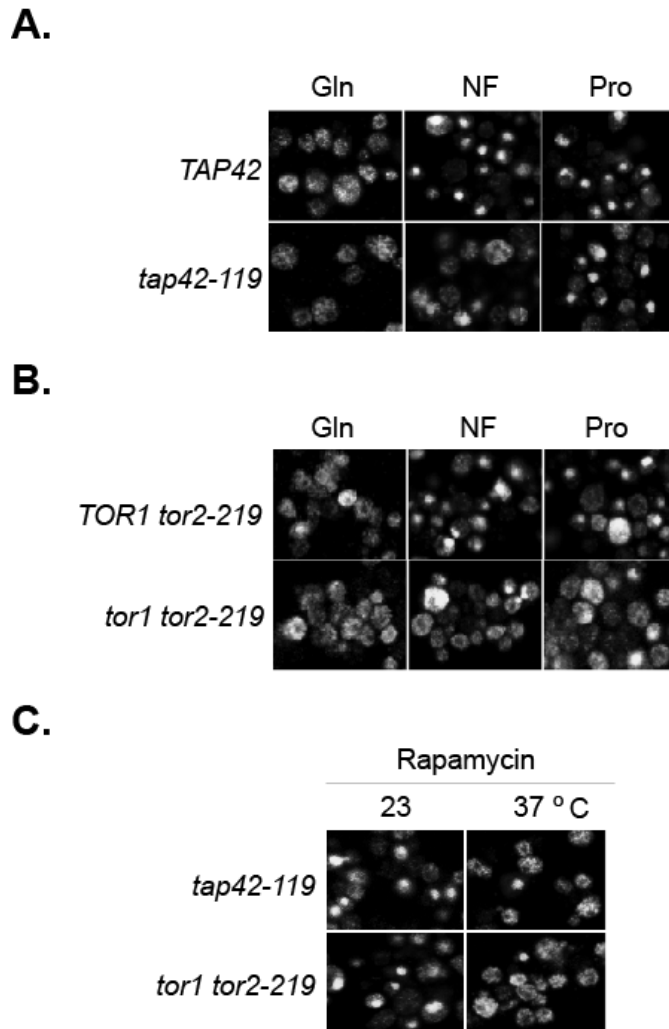

**Supplemental Figure 1. Gln3 distribution in wild type and mutant *tor* and *tap42* cells under different nitrogen conditions.** Exponentially growing cells expressing *GLN3*-myc in glutamine (Gln) medium were shifted from 23 to 37°C for 2 hr and then transferred to nitrogen-free (NF) or proline (Pro) medium for 30 min. **A.** *TAP42* (Y339) and *tap42-119* (Y351). **B.** *TOR1 tor2-219* and *tor1 tor2-219*. **C.** Exponentially growing *tap42-119* and *tor1 tor2-219* cells expressing *GLN3*-myc in glutamine (Gln) medium were shifted from 23 to 37°C for 2 hr and then treated with rapamycin for 30 min. Gln3-myc distribution in the cells was examined by immunofluorescent microscopy.

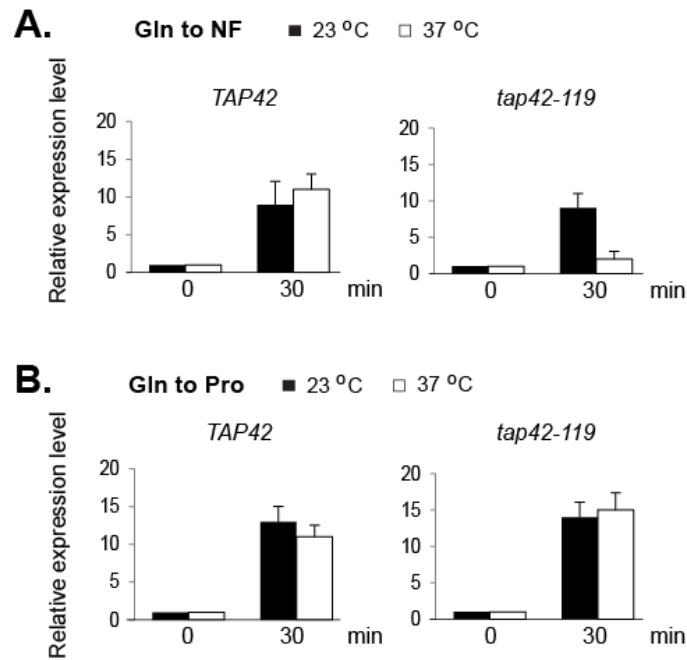

**Supplemental Figure 2. Tap42 is dispensable for nitrogen downshift-induced expression of *GLN1*.** Wild type (Y339) and *tap42-119* mutant (Y351) cells expressing *GLN3*-myc were grown at 23°C to early log phase in glutamine (Gln) medium. The cultures were divided and incubated for two additional hours with one half at 37°C and the other half at 23°C. Cells were then transferred to nitrogen-free (A) or proline (B) medium and collected before (time 0) and 30 min after the transfer. Expression levels of *GLN1* were analyzed by qRT-PCR and shown as relative values of treated vs. untreated samples. The experiment was repeated three times. The relative expression levels are shown as mean ± SD.

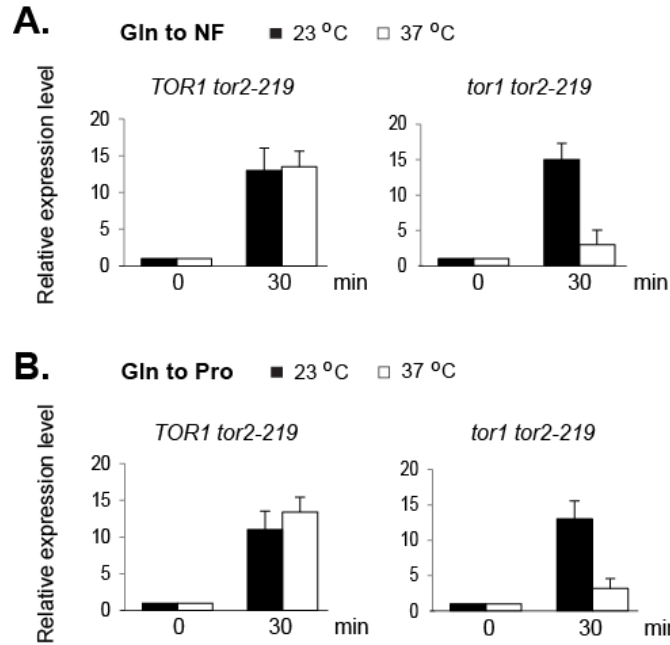

**Supplemental Figure 3. TORC1 is required for nitrogen limitation or downshift-induced *GLN1* expression.** The *tor2-219* (Y511) and *tor1 tor2-102* mutant (Y442) cells expressing *GLN3-myc* were grown at 23°C to early log phase in glutamine (Gln) medium. The cultures were divided and incubated for two additional hours with one half at 37°C and the other half at 23°C. Cells were then transferred to nitrogen-free (A) or proline (B) medium and collected before (time 0) and 30 min after the transfer. Expression levels of *GLN1* were analyzed by qRT-PCR and shown as relative values of treated vs. untreated samples. The experiment was repeated three times. The relative expression levels are expressed as mean  $\pm$  SD

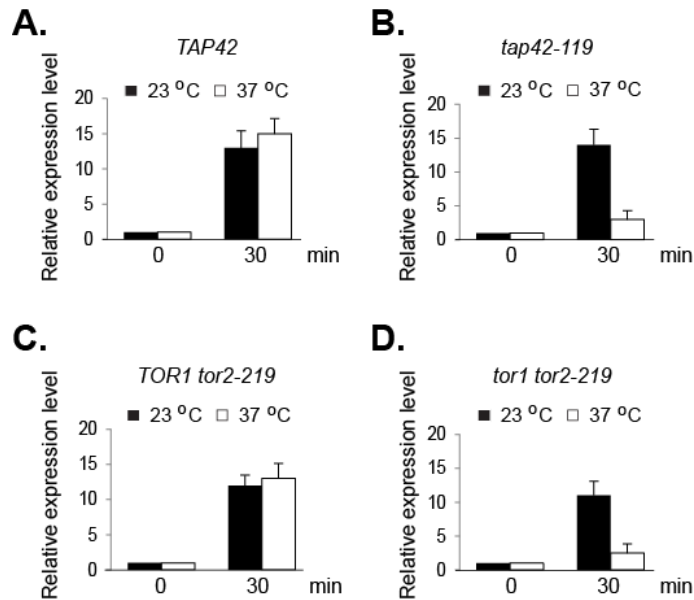

**Supplemental Figure 4. Both Tap42 and TORC1 are required for rapamycin-induced expression of *GLN1*.** Cells expressing *GLN3*-myc were grown at 23°C to early log phase in glutamine (Gln) medium. The cultures were divided, with one half shifted to 37°C and the other half remained at 23°C. Upon incubation for additional 2 hr, cells were treated with rapamycin and collected before (time 0) and 30 after addition of the drug. Expression levels of *GLN1* were analyzed by qRT-PCR and shown as relative values of treated vs. untreated samples. The experiment was repeated three times. The relative expression levels are expressed as mean  $\pm$  SD. **A.** Wild type (Y339), **B.** *tap42-119* mutant (Y351), **C.** *TOR1 tor2-219* (Y511), and **D.** *tor1 tor2-219* mutant (Y442).

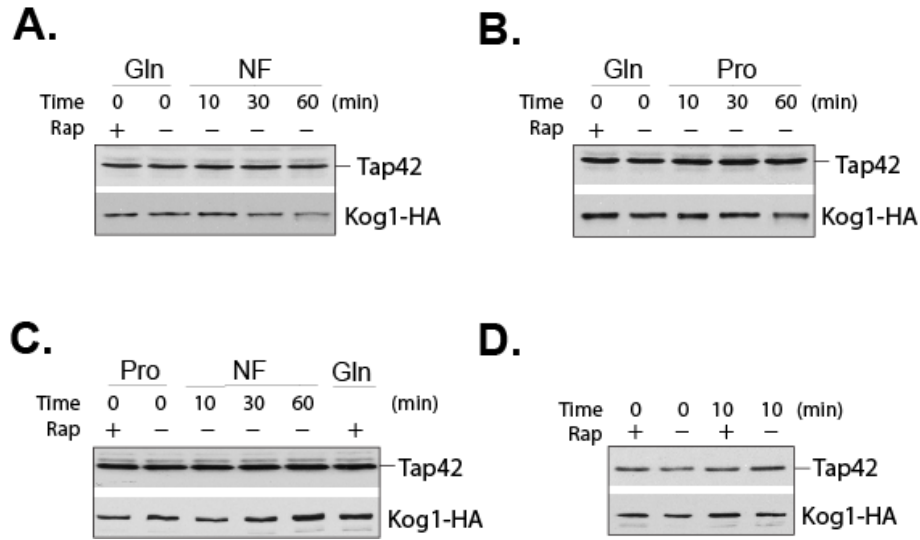

**Supplemental Figure 5. Expression levels of Tap42 and Kog1-HA in cells shown in Figure 4 of the main text.** Cells expressing *KOG1*-HA (Y1032) and *GLN3*-myc grown in glutamine medium (Gln) were treated with rapamycin for 30 min (Rap +) or transferred to nitrogen-free (NF) (A) or proline (Pro) medium (B) for indicated times. C. Cells grown in proline medium were treated with rapamycin for 30 min (Rap +) or transferred to nitrogen-free (NF) medium. Cells grown in glutamine medium were treated with rapamycin and included as a control (Gln Rap+). D. Cells grown in glutamine medium were treated with rapamycin (+) or drug vehicle (-) before and after being shifted to proline medium for 10 min. The expression levels of Tap42 and Kog1-HA in the cells were examined by western blotting. The association of Tap42 with Kog1-HA in the treated cells was assayed by immunoprecipitation and shown in Figure 4 of the main text.

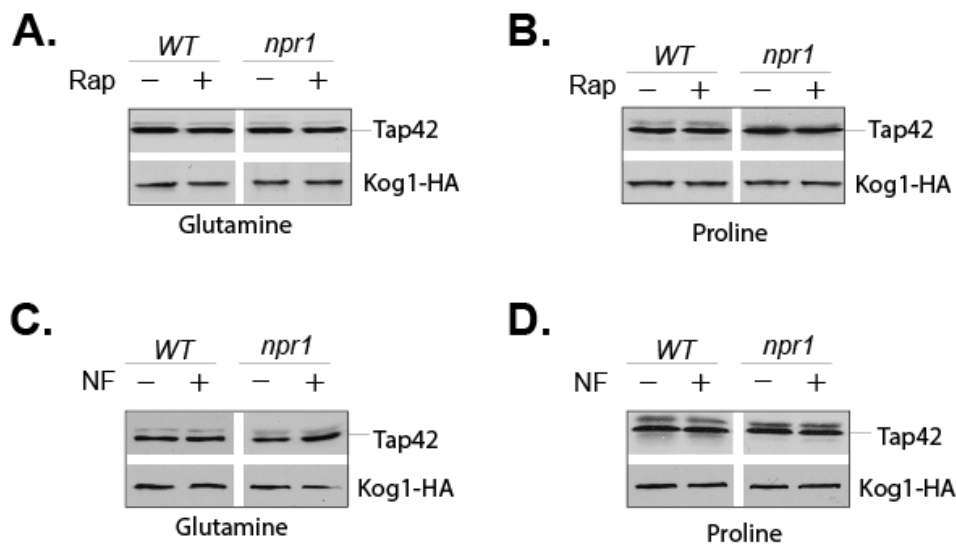

**Supplemental Figure 6. Expression levels of Tap42 and Kog1-HA in cells shown in Figure 6 of the main text.** Wild type (Y1032) and *npr1* deletion (Y1709) cells expressing *KOG1*-HA grown in glutamine (A) or proline medium (B) were treated with rapamycin (Rap +) or drug vehicle (Rap -) for 30 min. The same pairs of cells grown in glutamine (C) or proline medium (D) were transferred to nitrogen-free (NF) medium and collected before and 30 min after the transfer. The expression levels of Tap42 and Kog1-HA in the cells were examined by western blotting. The association of Tap42 with Kog1-HA in the treated cells was assayed by immunoprecipitation and shown in Figure 6 of the main text.

## 2. Supplemental Methods

**Quantitative RT-PCR** — Total yeast cell RNA was isolated using the Qiagen RNeasy MiniKit (Qiagen, Chatsworth, CA). cDNA was generated from the isolated RNA using iScript Reverse Transcription kit (Bio-Rad, Hercules, CA) following manufacturer's instructions. cDNA was analyzed by RT-PCR for levels of *GLN1* and *ACT1* using previously reported primers as follows (Crespo *et al.*, 2002): *GLN1*, 5'-CGTTTGGATCGATGGTACTG-3' and 5'-CGCAAACAGTTTCACACATG-3'; *ACT1*, 5'-ATGGATTCTGAGGTTGCTGC-3' and 5'-ACCTTCATGGAAGATGGAGC-3'. The expression level of *GLN1* was normalized to that of *ACT1* in the same sample.

## 3. Supplemental References:

Crespo, J.L., T. Powers, B. Fowler & M.N. Hall, (2002) The TOR-controlled transcription activators GLN3, RTG1, and RTG3 are regulated in response to intracellular levels of

glutamine. *Proceedings of the National Academy of Sciences of the United States of America* **99**: 6784-6789.
